# Supplementary material for: A layering technique for achieving pinhole-free organic–inorganic halide perovskite thin films through the vapor–solid reaction
Source: Royal Society of Chemistry journal article supplement (doi:10.1039/d4se00320a), 2024-01-01
Supplement: d4se00320a1.pdf [file d4se00320a1.pdf]

## Supporting Information

# Layering technique for achieving pinhole-free organic-inorganic halide perovskite thin films through vapor-solid reaction

Lixin Zhang<sup>a</sup>, Jialing Zhong<sup>a</sup>, Anqi Kong<sup>a</sup>, Yuanyuan Chen<sup>a</sup>, Junshuai Fan<sup>a</sup>, Qiang Tan<sup>a</sup>, Yong Peng<sup>a</sup>, Guijie Liang<sup>b</sup> and Zhiliang Ku<sup>\*a</sup>

<sup>a</sup>State Key Lab of Advanced Technologies for Materials Synthesis and Processing, Wuhan University of Technology, 122 Luoshi Road, Wuhan 430070, Hubei Province, China

<sup>b</sup>Hubei Key Laboratory of Low Dimensional Optoelectronic Material and Devices, Hubei University of Arts and Science, 296 Longzhong Road, Xiangyang 441053, Hubei Province, China

\* Corresponding author: Zhiliang Ku, E-mail: [zhiliang.ku@whut.edu.cn](mailto:zhiliang.ku@whut.edu.cn)

**Keywords:** Lead halide perovskite; Pinhole-free; Vapor-solid reaction; thin film; Layering technique

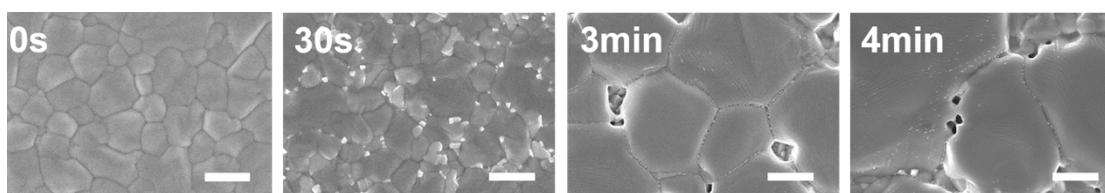

**Figure S1.** Scanning electron microscope (SEM) images of the perovskite thin films with different reaction times in FASCN vapor. Scale bar, 1 μm.

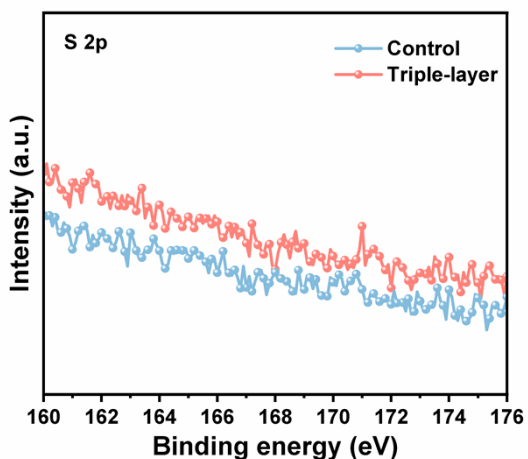

**Figure S2.** XPS spectra of the S 2p signal in the perovskite thin film with control and triple-layer.

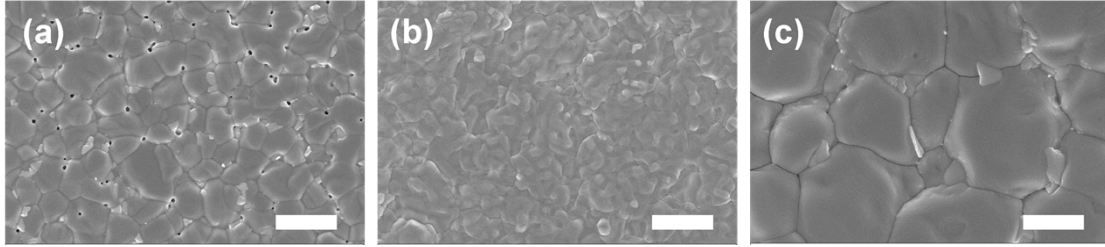

**Figure S3.** Scanning electron microscope (SEM) images during the preparation of double-layer perovskite thin films. (a) 300 nm perovskite thin film treated with FASCN vapor, (b) 300nm FASCN-perovskite/ 300 nm vapor-solid perovskite, (c) 300 nm FASCN-perovskite/300 nm FASCN-perovskite. Scale bar, 2  $\mu\text{m}$ .

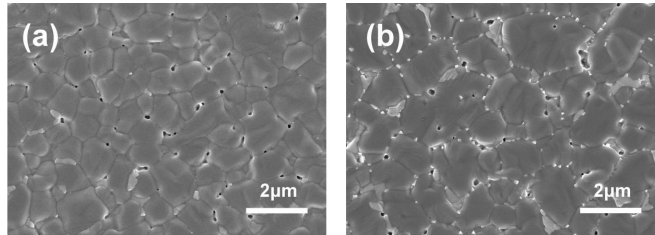

**Figure S4.** SEM images of the FASCN vapor-treated films (a) unannealed and (b) annealed.

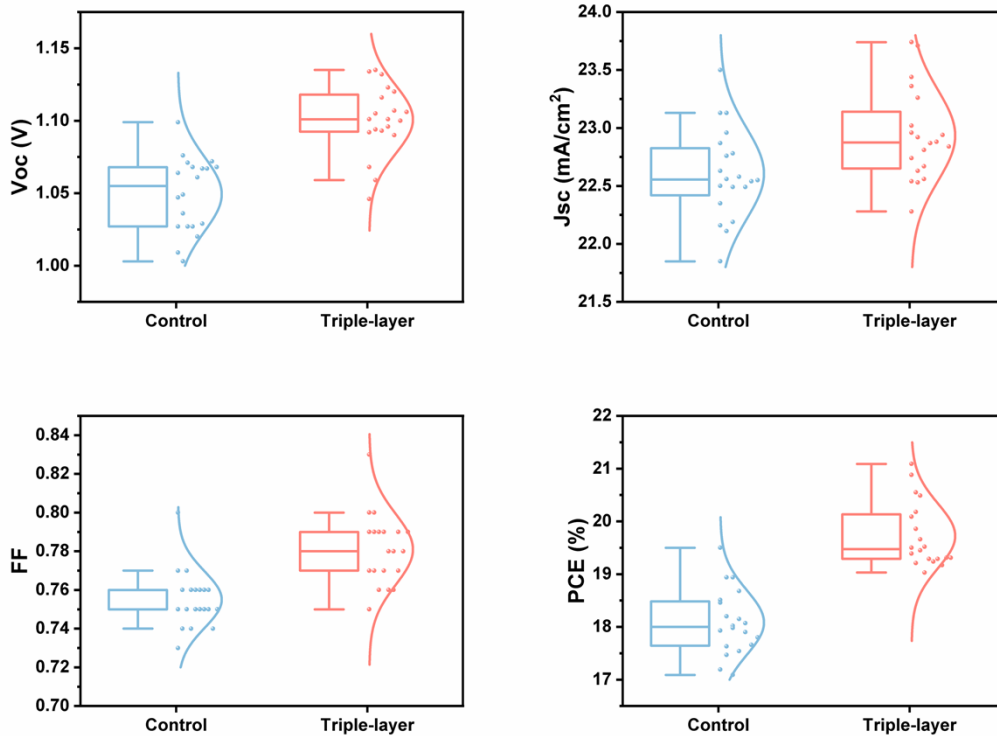

**Figure S5.** Statistics of the photovoltaic parameters distribution for solar cells based on control and triple-layer perovskite, 20 independent cells are fabricated for each type.

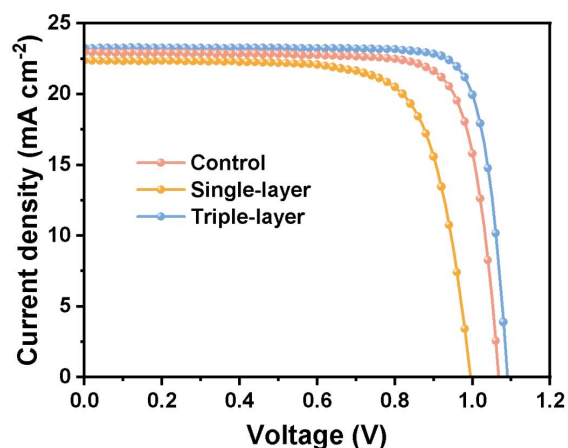

**Figure S6.** J-V curves of devices based on different layers of thin films

**Table S1.** Biexponential fitted TRPL parameters of the control and triple-layer samples.

| Samples      | $A_1$ | $\tau_1$ (ns) | $A_2$ | $\tau_2$ (ns) | $\tau_{avg}$ (ns) |
|--------------|-------|---------------|-------|---------------|-------------------|
| Control      | 0.503 | 7.30          | 0.423 | 154.26        | 146.43            |
| Triple-layer | 0.510 | 7.85          | 0.424 | 318.48        | 309.54            |

**Table S2.** J-V parameters of the champion devices measured from forward scan (FS) and reverse scan (RS).

| Champion device |    | $V_{oc}$ (V) | $J_{sc}$ (mA cm <sup>-2</sup> ) | FF   | PCE (%) |
|-----------------|----|--------------|---------------------------------|------|---------|
| Control         | RS | 1.068        | 22.96                           | 0.80 | 19.50   |
|                 | FS | 1.047        | 22.76                           | 0.76 | 18.20   |
| Triple-layer    | RS | 1.090        | 23.26                           | 0.83 | 21.09   |
|                 | FS | 1.088        | 23.15                           | 0.80 | 20.06   |

**Table S3** Photovoltaic parameters of devices based on different layers of films.

| Device       | $V_{oc}$ (V) | $J_{sc}$ (mA cm <sup>-2</sup> ) | FF   | PCE (%) |
|--------------|--------------|---------------------------------|------|---------|
| Control      | 1.068        | 22.96                           | 0.80 | 19.50   |
| Single-layer | 0.995        | 22.35                           | 0.74 | 16.42   |
| Triple-layer | 1.090        | 23.26                           | 0.83 | 21.09   |

**Table S4** EIS Fitting parameters of solar cells based on control and triple-layer modified devices. The series resistance ( $R_s$ ) and charge composite resistance ( $R_{rec}$ ) can be obtained by data fitting of equivalent circuit diagram of PSCs by EC-Lab software.

| <b>Samples</b> | <b><math>R_s</math> (<math>\Omega</math>)</b> | <b><math>R_{rec}</math> (k<math>\Omega</math>)</b> |
|----------------|-----------------------------------------------|----------------------------------------------------|
| Control        | 9.962                                         | 2.988                                              |
| Triple-layer   | 9.379                                         | 6.978                                              |
